# Supplementary material for: The TVGH-NYCU Thal-Classifier: Development of a Machine-Learning Classifier for Differentiating Thalassemia and Non-Thalassemia Patients
Source: MDPI journal article supplement (doi:10.3390/diagnostics11091725), 2021-09-20

**Table S1.** Formula of 13 indices.

| Index                  | Formula                                                     | Cut-off point of indicated Thalassemia |
|------------------------|-------------------------------------------------------------|----------------------------------------|
| Mentzer                | $\frac{MCV}{RBC}$                                           | <13                                    |
| RDWI                   | $\frac{MCV \times RDW}{RBC}$                                | <220                                   |
| Cruise                 | $MCHC + 0.603 RBC + 0.523 RDW$                              | >42.63                                 |
| Shin&Lal (S.L)         | $\frac{MCV^2 \times MCH}{100}$                              | <1530                                  |
| Sirvastava             | $\frac{MCH}{RBC}$                                           | <3.8                                   |
| Green & King (G.K)     | $0.01 \times MCV^2 \times RDW$                              | <65                                    |
| Sirdah                 | $\frac{Hb}{MCV - RBC - 3 \times Hb}$                        | <27                                    |
| Ehsani                 | $\frac{MCH - 10 \times RBC}{MCV - RBC - 5 \times Hb - 3.4}$ | <15                                    |
| England & Fraser (E.F) | $\frac{RDW}{RBC \times MCH}$                                | <44                                    |
| Ricerca                | $\frac{MCV}{MCH/MCV}$                                       | >1.75                                  |
| MDHL                   | $\frac{MCH}{MCV}$                                           | <0.34                                  |
| Huber-Herklotz (H.H)   | $RDW + \frac{0.1 \times MCH \times RDW}{RBC}$               | <20                                    |

**Figure S1.** Distribution of three groups of patient in 13 indices.

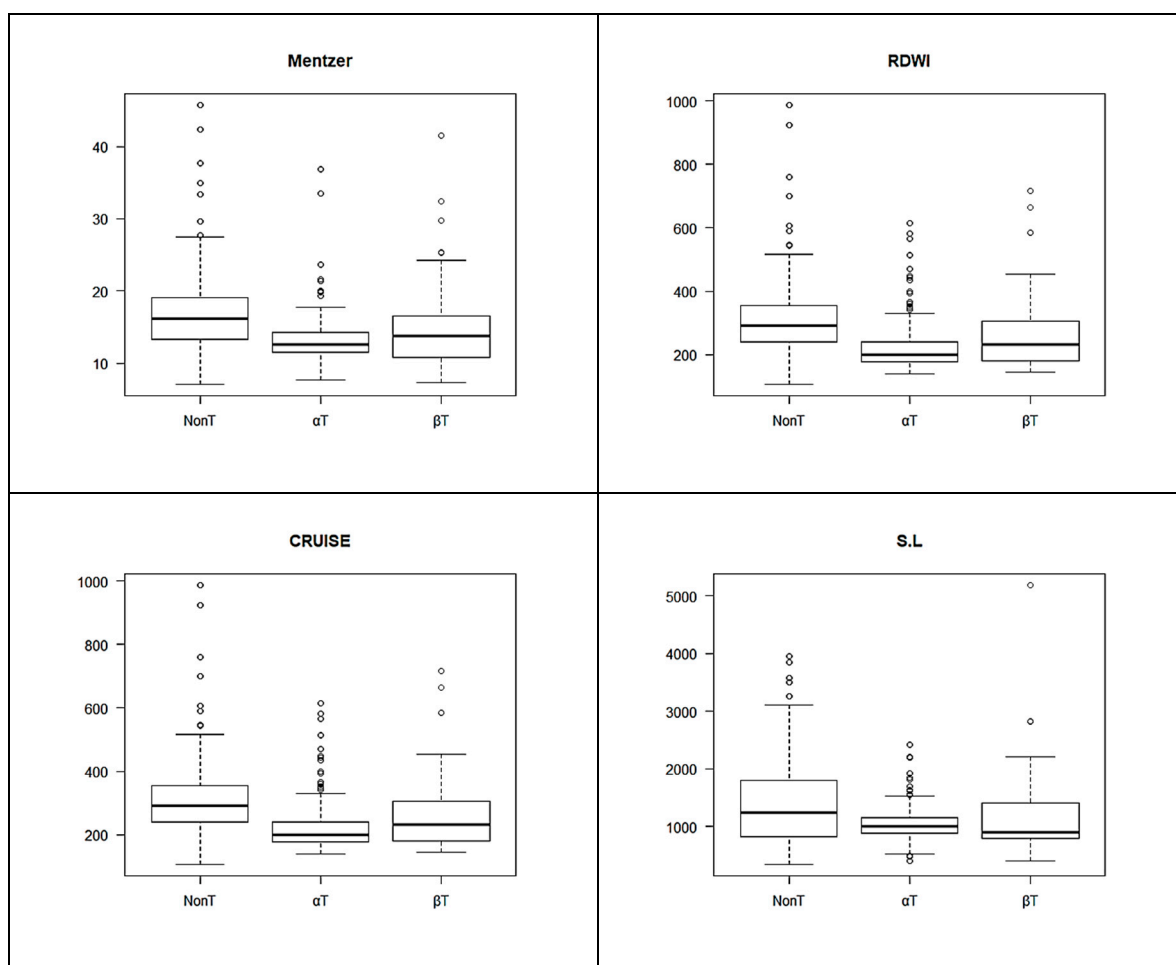

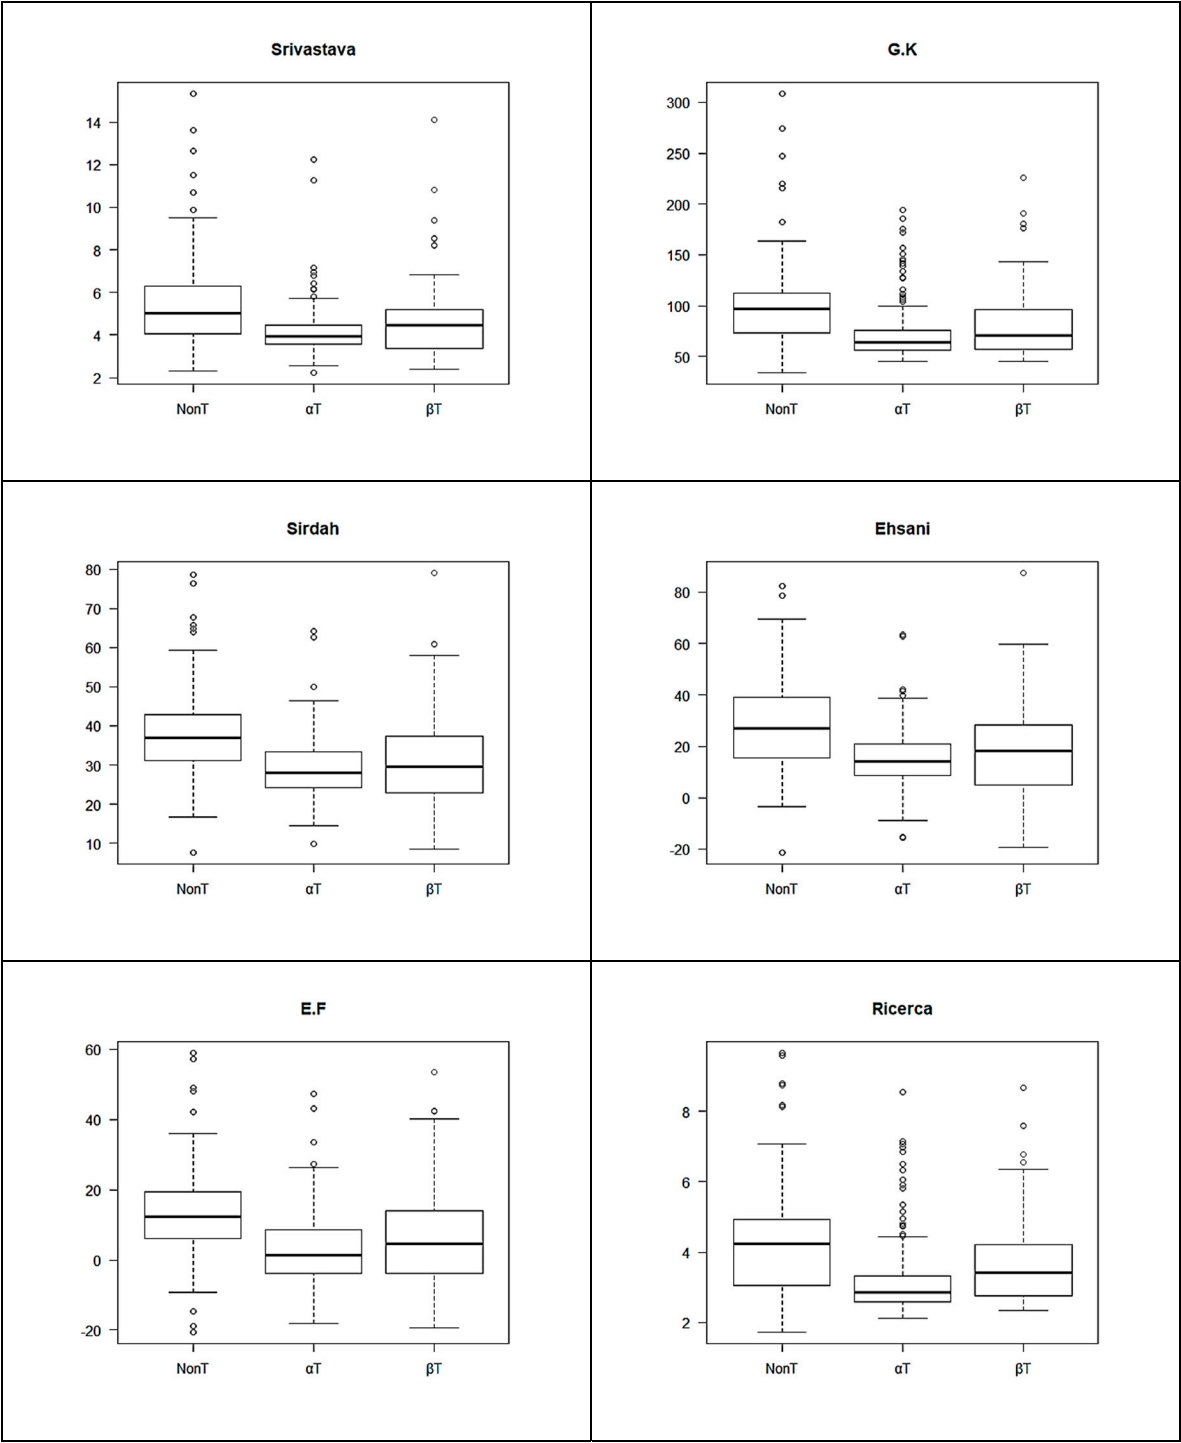

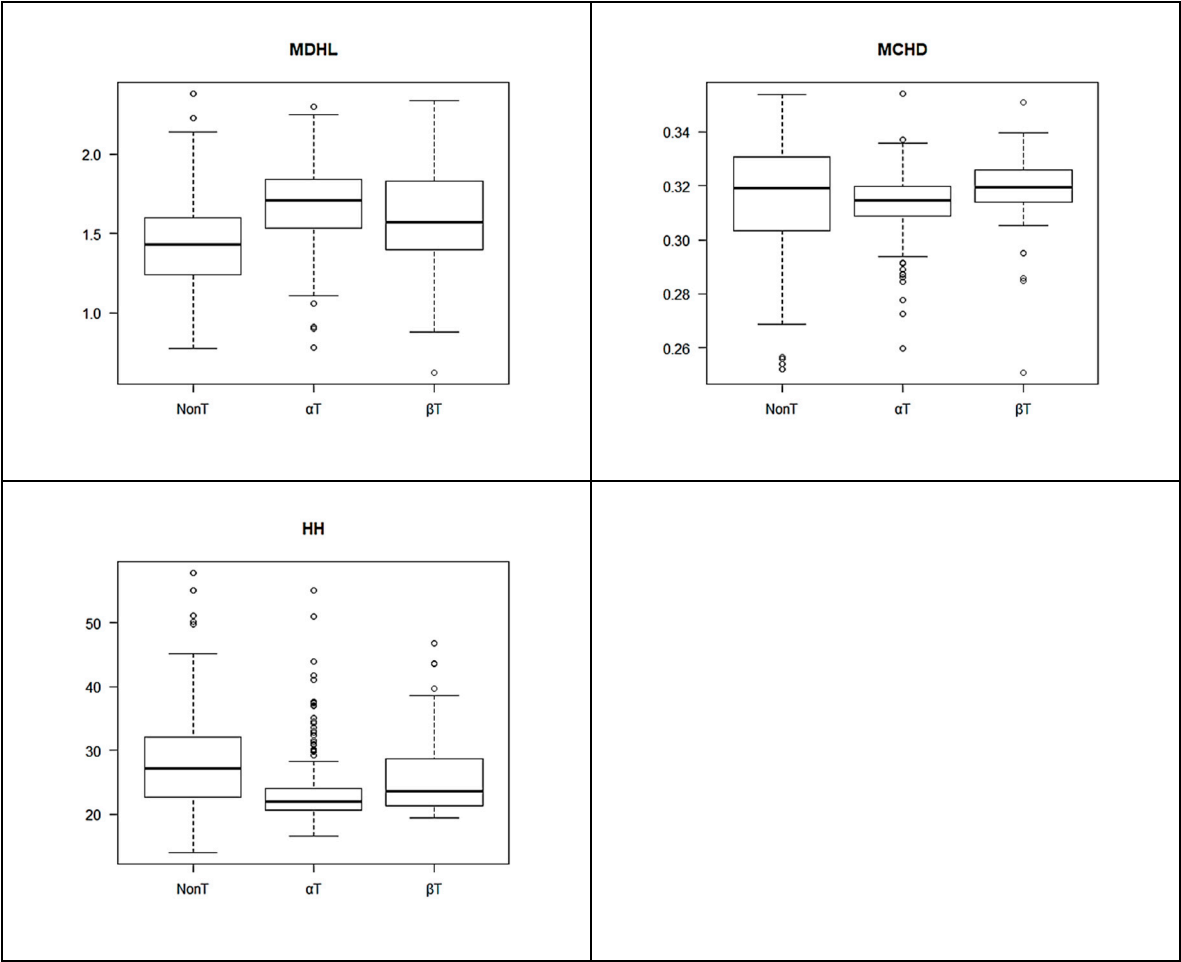

Supplement: s1 [file s1]
